# Supplementary material
Source: publisher site journal article supplement (https://www.dovepress.com/article/569180)
Supplement: Supplementary file 1 [file 569180%20Revised%20Supplementary%20Materials.docx]

# **Supplementary Material 1: LC-MS/MS Analysis of Procedures and Results**

# **Materials and methods**

***Measurement of meropenem Cmin and ORM concentration***

The meropenem standard (Lot No. 24N0322, purity ≥98%) was supplied by Ita Biotechnology Co., Ltd. (Beijing, China). The ORM of meropenem (trifluoroacetate salt, Lot No. MR230529769, purity 98.1%) was obtained from SCR-Biotech Co., Ltd. (Shanghai, China). The internal standard meropenem-D6 (Lot No. B12-A1522, purity ≥95%) and its corresponding ORM-D6 (trifluoroacetate salt, Lot No. B12-A1523, purity ≥95%) were provided by Beiyu Biological Technology Co., Ltd. (Nanjing, China). All other chemicals and solvents used were of analytical or HPLC grade and commercially available.

The chromatographic system employed was the Shimadzu LC-20 liquid chromatography system from Japan. Mass spectrometry analysis was conducted using the API 4000 QTrap triple quadrupole tandem mass spectrometer. Detection was performed via electrospray ionization mass spectrometry in multiple reaction monitoring (MRM) mode with positive ion detection for both meropenem and its ORM. The MRM transitions utilized were as follows: m/z 384.1 → m/z 141.0 for meropenem; m/z 402.1 → m/z 358.4 for the ORM; m/z 390.1 → m/z 147.2 for meropenem-D6; and m/z 408.2 → m/z 364.1 for the ORM-D6. Chromatographic conditions included an Eigel Venusil MP C18 column (150 × 2.1 mm, particle size: 5 μm), with mobile phase A consisting of a solution containing 0.1% formic acid and 5 mM ammonium acetate in water, while mobile phase B comprised acetonitrile. The elution gradient applied to the mobile phases was as follows: at time zero, phase B constituted 5%; between minutes 0.75 to 2 min, it increased linearly to reach a maximum of phase B at 90%; maintained at this concentration from minutes two to five-and-a-half; then decreased back to phase B at five percent over a duration spanning from five-and-a-half minutes to six minutes before stabilizing again until eight minutes post-injection. The flow rate during these analyses was set at 0.3 mL/min with an injection volume of 5 μL.


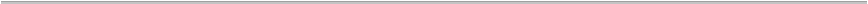


# **Results**

***Specificity***

As shown in Supplementary Figures 2 and 3, in serum samples, the retention times of meropenem and its internal standard (meropenem-D6) were 3.93 min and 3.92 min, respectively; the retention times of its ORM and the corresponding internal standard (ORM-D6) were 3.86 min and 3.85 min, respectively. In CSF samples, the retention times of meropenem and meropenem-D6 were 3.94 min and 3.93 min, respectively, while those of ORM and ORM-D6 were 3.86 min and 3.85 min, respectively. No interference was observed from endogenous substances in either serum or CSF, demonstrating that the developed LC-MS/MS method exhibits excellent specificity for the determination of meropenem, its ORM, and their internal standards in both matrices.

***Standard curve and Lower Limit of Quantification (LLOQ)***

The linear range for meropenem and its ORM was 0.1–100 μg/mL, with detailed regression equations provided in Supplementary Table 1. The method demonstrated excellent linearity, and the LLOQ was determined to be 0.100 μg/mL in both human serum and CSF samples.

***Precision and Recovery***

In serum, the intraday precision of meropenem was < 8.0%, interday precision was < 8.3%, and accuracy (RE) ranged from -2.7% to 1.0%; the intraday precision (RSD) of its ORM was < 7.8%, interday precision was < 7.7%, and RE ranged from 1.5% to 5.8%. In CSF, the intraday precision of meropenem was < 8.0%, interday precision was < 6.5%, and RE was between -2.5% and 0.9%; the intraday precision of its ORM was < 8.9%, interday precision was < 9.0%, and RE ranged from -8.4% to -1.5%. Both analytes exhibited excellent precision and accuracy in the two matrices.

***Stability***

Stability test results demonstrated that meropenem and its ORM in human serum and CSF samples exhibited reliable stability under the following conditions: long-term storage at -80℃ for 30 days, three freeze-thaw cycles, short-term incubation on ice (mimicking ambient temperature exposure) for 1 hour, and post-treatment storage in the autosampler at 4℃ for 24 hours. Specifically, the relative standard deviation (RSD) values were consistently below 15%, and the relative error (RE) values were maintained within the range of ±15%, which fully meets the requirements for biological sample analysis.

***Matrix Effect***

The precision (RSD) of meropenem in serum ranged from 3.2% to 3.8%, with accuracy (RE) between 8.0% and 9.3%. For the ORM in serum, precision was 3.1%–6.9% and accuracy ranged from -6.9% to 8.5%. In CSF, meropenem exhibited precision of 4.6%–5.6% and accuracy of 4.6%–6.5%, while its metabolite showed precision of 3.5%–7.8% and accuracy between -9.6% and -7.1%. The results demonstrate that under the chromatographic and mass spectrometric conditions applied in this study, no significant matrix effect was observed in either serum or CSF.

**Supplementary Table 1** Standard Curve Equations of Meropenem and Its ORM

| Samples | Slope (×10-1) | Offset (×10-3) | Correlation coefficient (r) |
| --- | --- | --- | --- |
| Meropenem serum sample | 9.39 | -11.40 | 0.9978 |
| ORM serum sample | 3.58 | -8.67 | 0.9958 |
| Meropenem CSF sample | 4.65 | 1.59 | 0.9987 |
| ORM CSF sample | 2.31 | -0.67 | 0.9971 |

**
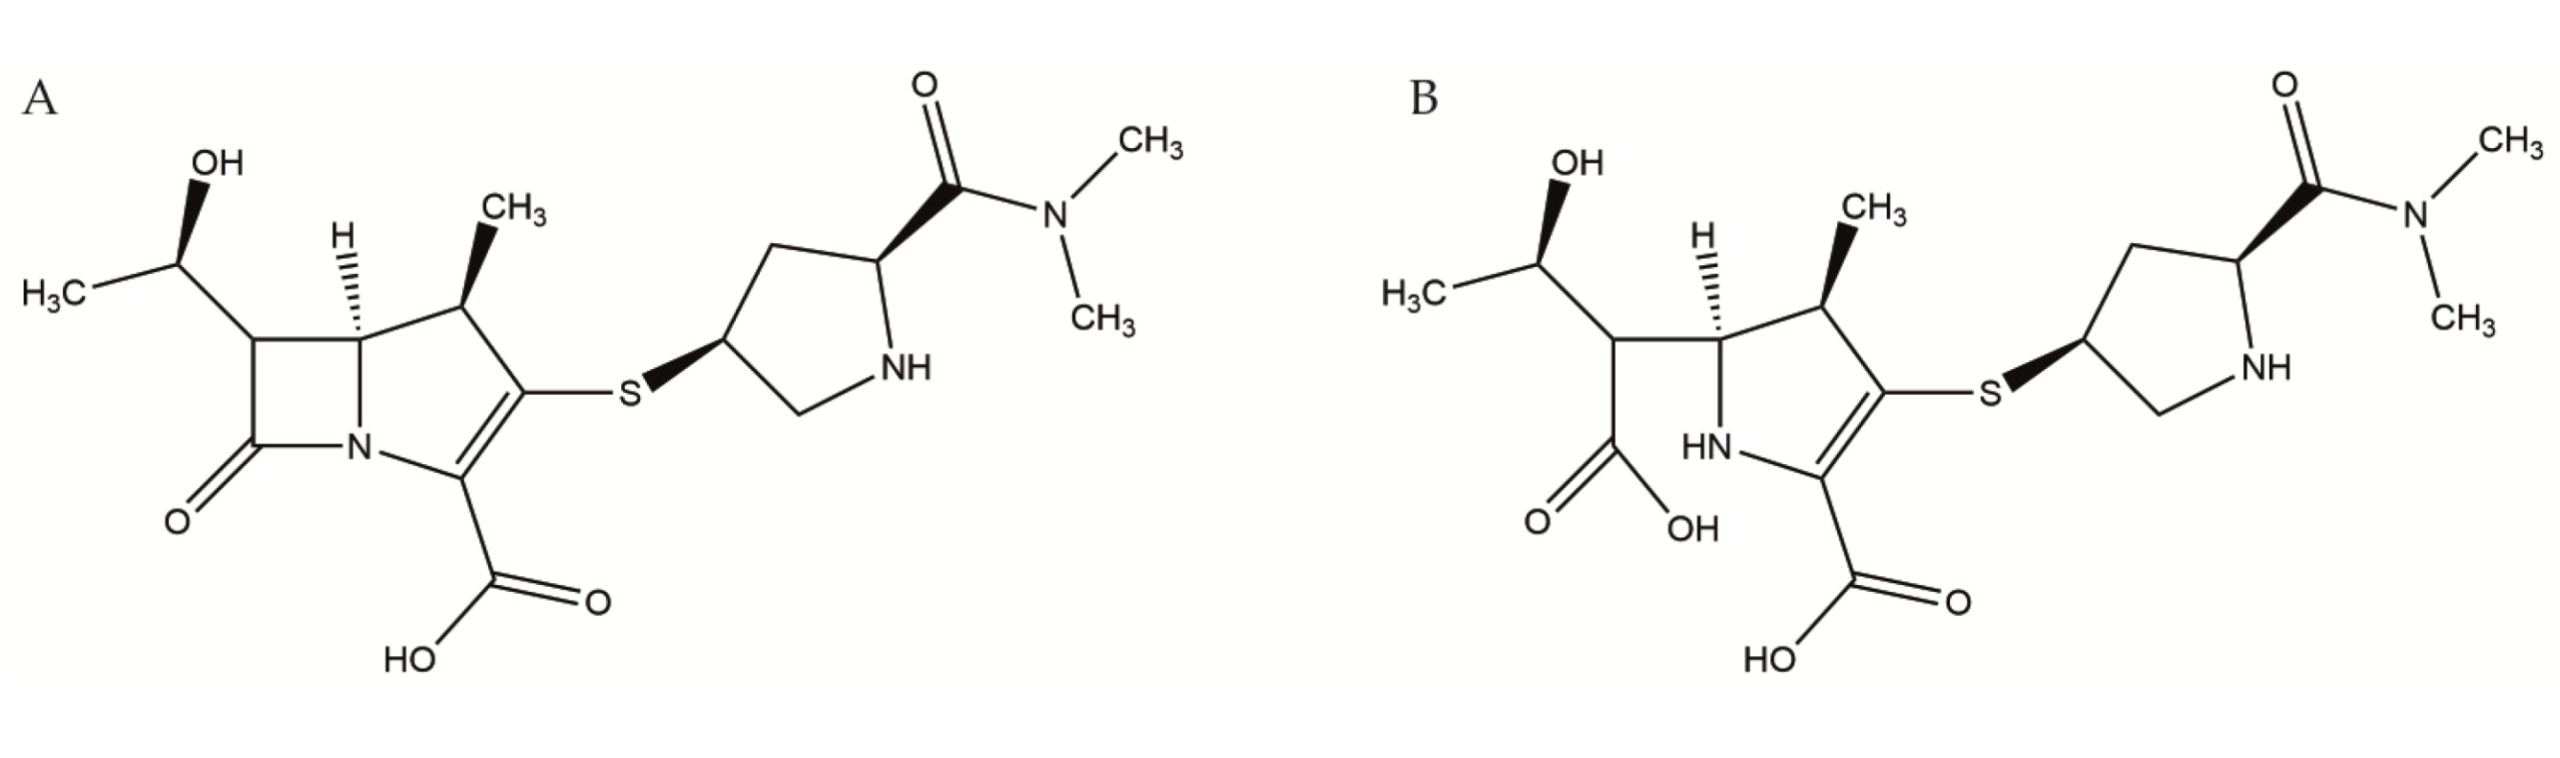
**

**Supplementary Figure 1** Molecular structure of (**A**) meropenem and (**B**) its main degradation product, the open-ring metabolite (ORM).

**Notes:** Source reprinted from Liebchen et al., Antibiotics, 2021, 10(6), 715 (https://doi.org/10.3390/antibiotics10060715). Licensed under CC BY 4.0.

**
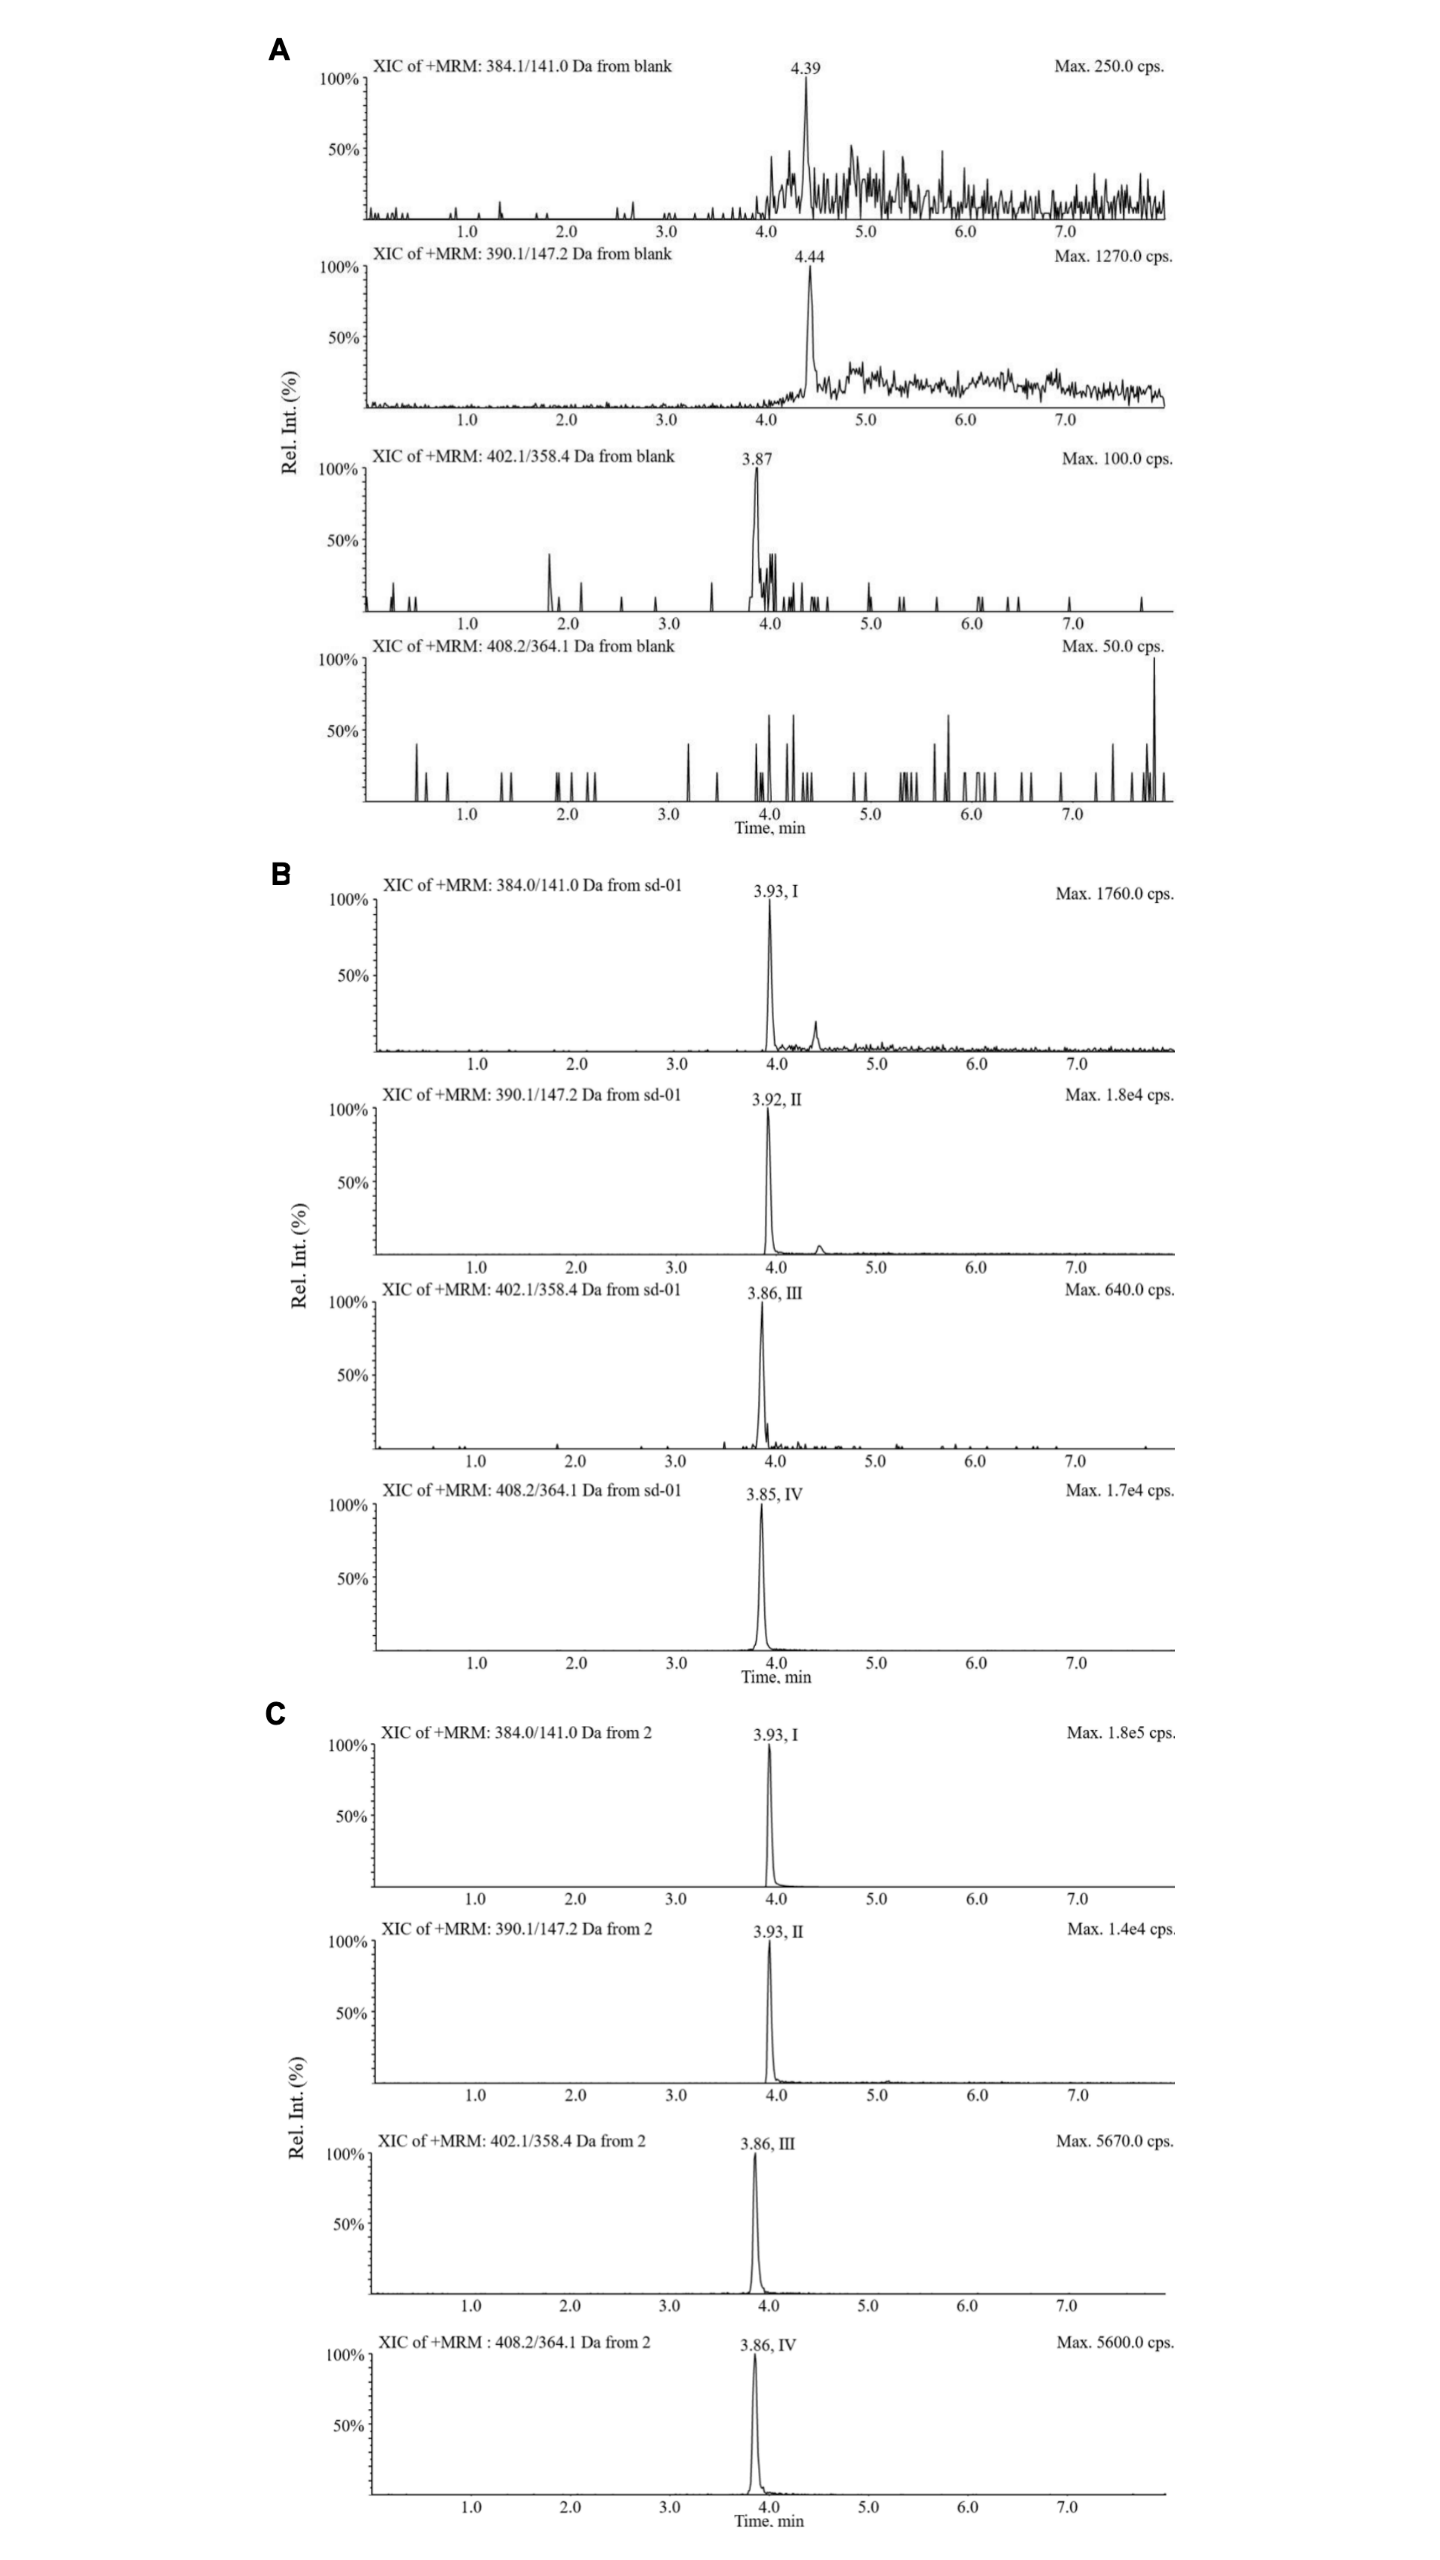
**

**Supplementary Figure 2** Typical MRM Chromatograms of Meropenem, Its ORM, and Internal Standards (Meropenem-D6 and ORM-D6) in Human Serum Determined by LC-MS/MS

**Notes:** (A) Blank human serum (B) Blank human serum spiked with meropenem, its ORM, and internal standards (C) Representative patient serum sample；；Peaks are labeled as follows: I, meropenem; II, meropenem-D6; III, ORM; IV, ORM-D6.


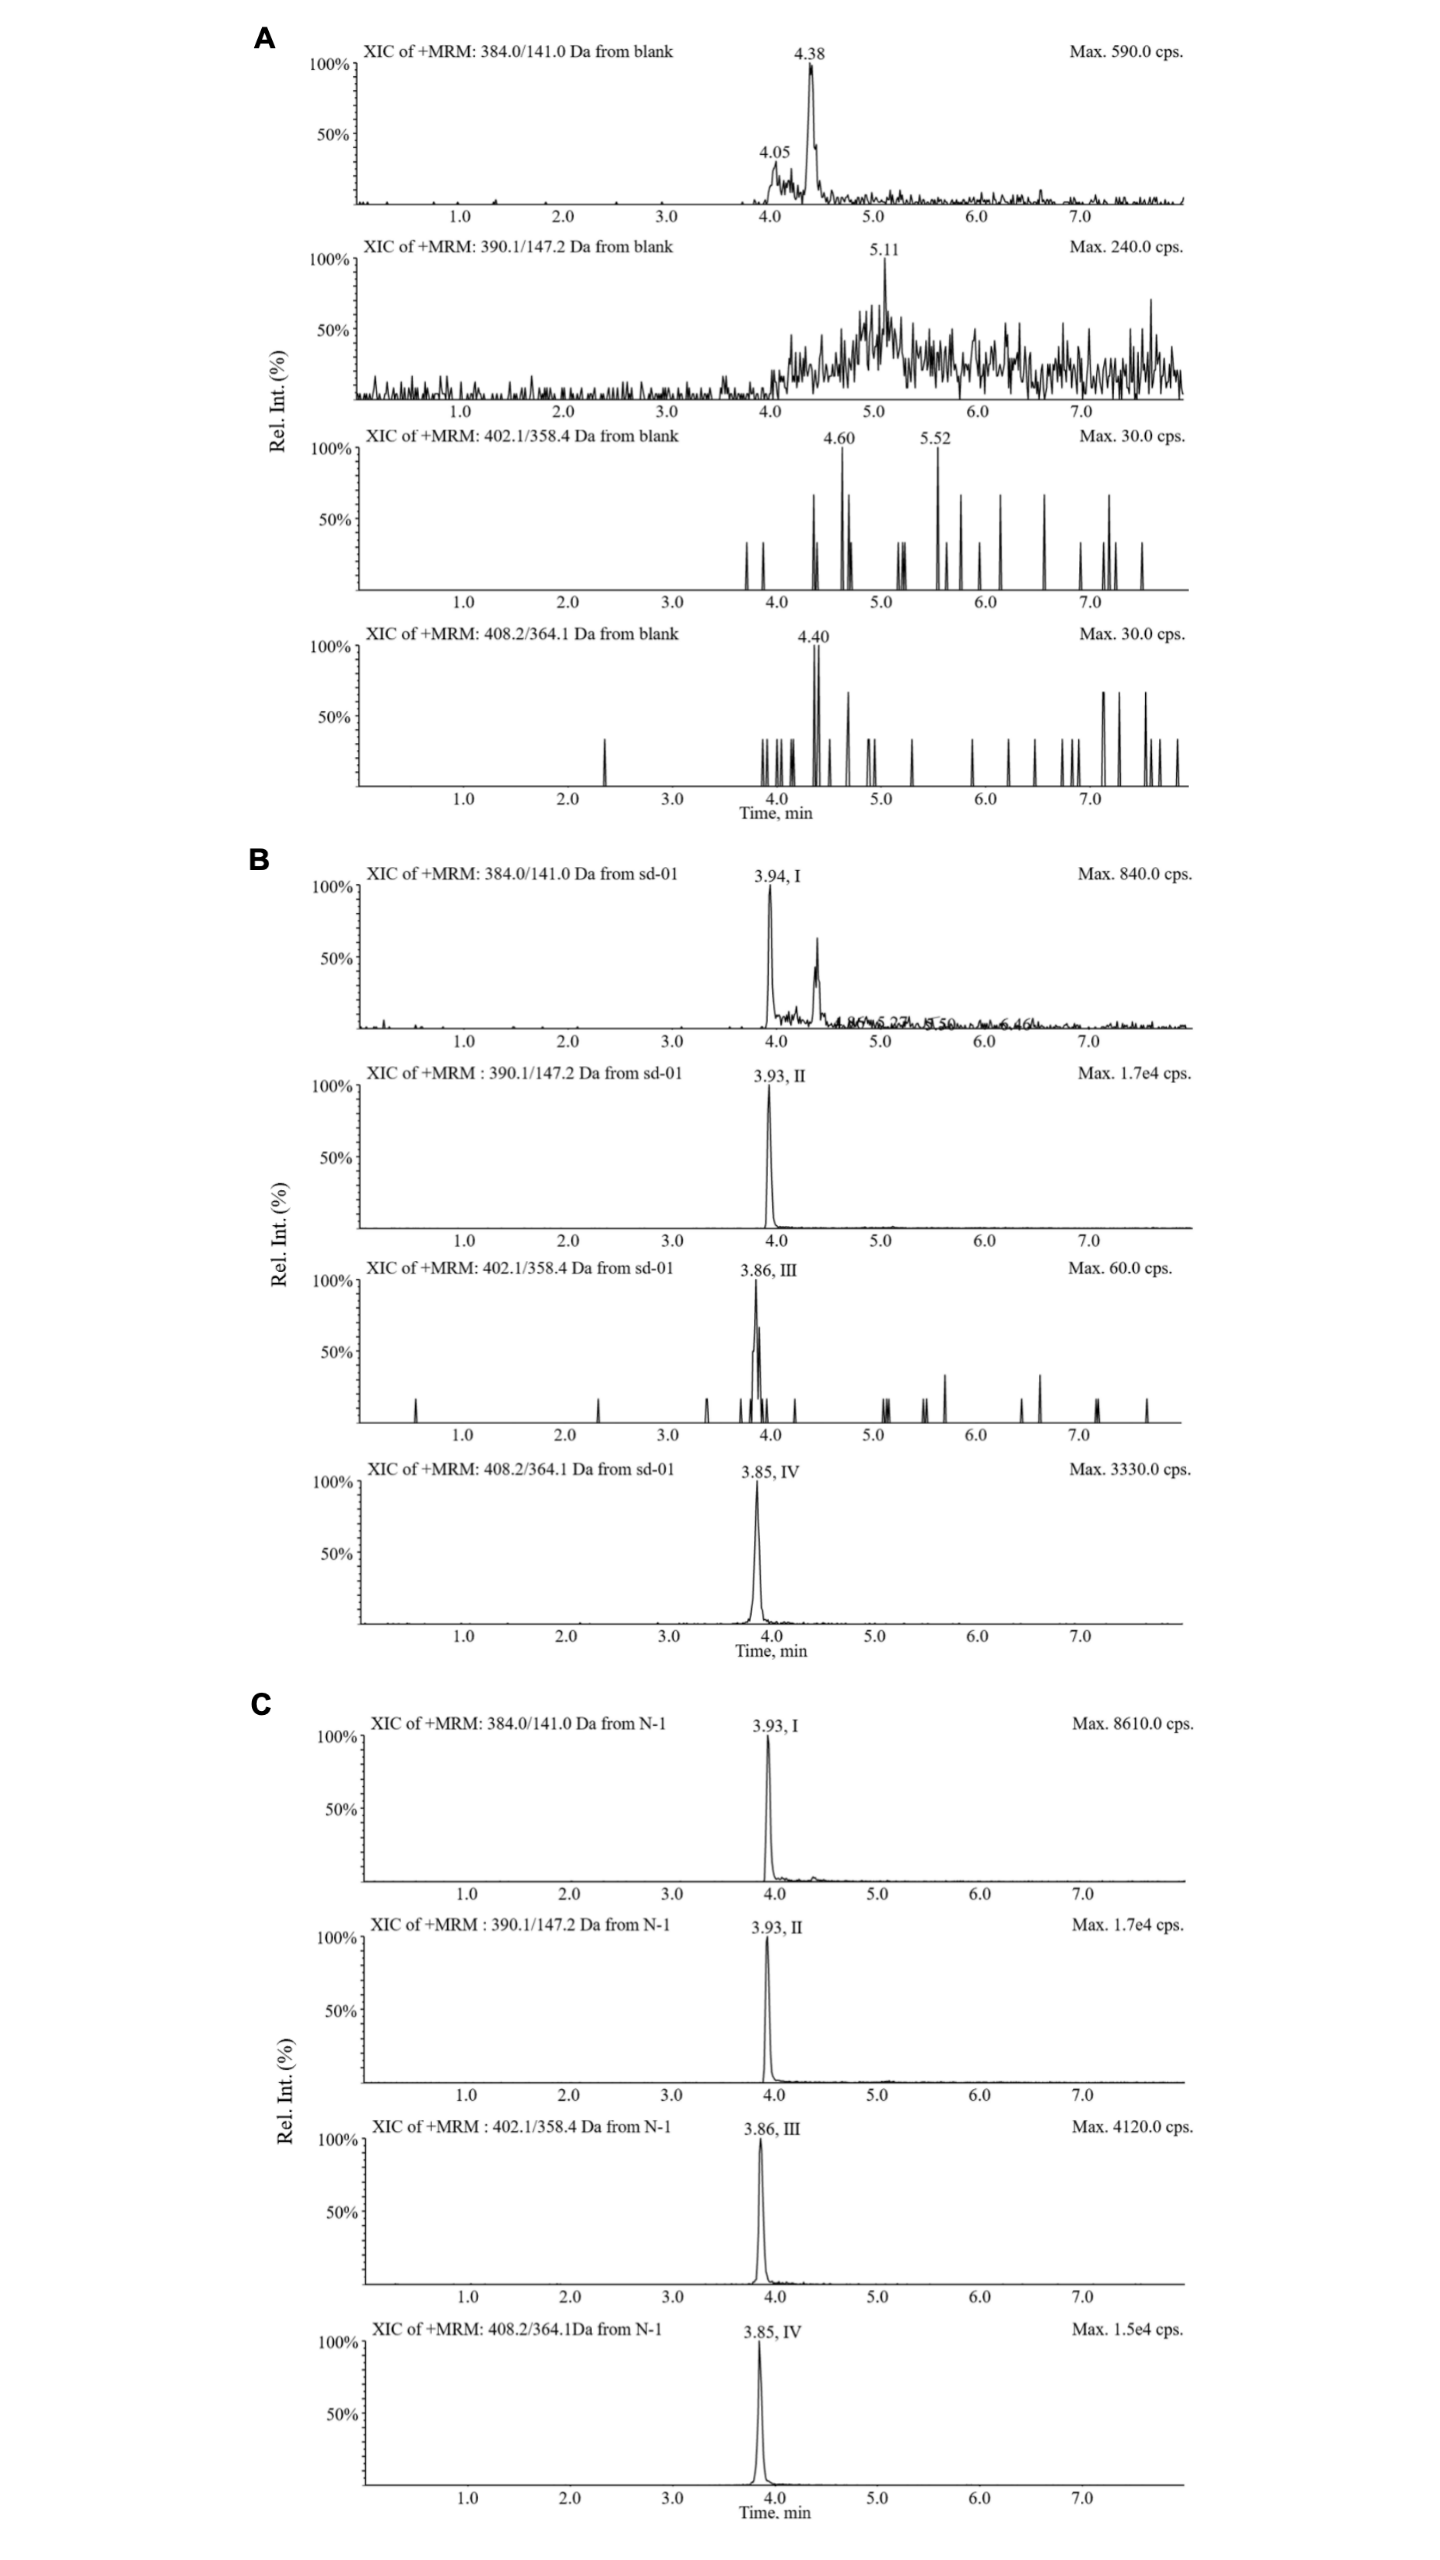


**Supplementary Figure 3** Typical MRM Chromatograms of Meropenem, Its ORM, and Internal Standards (Meropenem-D6 and ORM-D6) in Human Cerebrospinal fluid (CSF) Determined by LC-MS/MS

**Notes:** (A) Blank human CSF (B) Blank human CSF spiked with meropenem, its ORM, and internal standards (C) Representative patient CSF sample；Peaks are labeled as follows: I, meropenem; II, meropenem-D6; III, ORM; IV, ORM-D6.
